# Supplementary material for: Development of adjoint-based ocean state estimation for theAmundsen and Bellingshausen Seas and ice shelf cavities usingMITgcm/ECCO
Source: Copernicus journal article supplement (doi:10.5194/gmd-2020-421), 2021-02-17
Supplement: Supplementary file [file gmd-2020-421-AC1-supplement.pdf]

**Response to the specific comments and corrections of the reviewers  
(Italic: comment of reviewer, bold: our reply)**

**We greatly appreciate all very helpful and insightful comments by the reviewers.**

*Executive Editor (Comments to Author (shown to authors):*

*Dear authors,*

*in my role as Executive editor of GMD, I would like to bring to your attention our Editorial version 1.2:*

*<https://www.geosci-model-dev.net/12/2215/2019/>*

*This highlights some requirements of papers published in GMD, which is also available on the GMD website in the 'Manuscript Types' section:*

*[http://www.geoscientific-model-development.net/submission/manuscript\\_types.html](http://www.geoscientific-model-development.net/submission/manuscript_types.html)*

*In particular, please note that for your paper, the following requirement has not been met in the Discussions paper:*

- *"The main paper must give the model name and version number (or other unique identifier) in the title."*

*Please add a version numbers for MITgcm/ECCO in the title upon your revised submission to GMD.*

*Yours, Astrid Kerkweg*

**As suggested, we include version number in the title.**
